# Supplementary material for: Chronic heavy drinking and ischaemic heart disease: a systematic review and meta-analysis
Source: PubMed Central journal article supplement — Open Heart. 2014 Aug 6;1(1):e000135. doi: 10.1136/openhrt-2014-000135 (PMC4189294; doi:10.1136/openhrt-2014-000135), 2014-08-06
Supplement: openhrt-2014-000135-s1.pdf [file openhrt-2014-000135-s1.pdf]

# Chronic Heavy Drinking and Ischaemic Heart Disease: A Systematic Review and Meta-Analysis

## **SUPPLEMENTARY MATERIAL**

### **Supplementary Methods**

Systematic Review Protocol

### **Supplementary Figures**

Supplementary Figure 1. Search Results for Population Studies on Chronic Heavy Alcohol Consumption and Ischaemic Heart Disease Risk

Supplementary Figure 2. Search Results for Patients With Alcohol Use Disorder (AUD, Clinical Samples) and Ischaemic Heart Diseases Mortality

Supplementary Figure 3. Funnel Plot for Ischaemic Heart Disease incidence Among Chronic Heavy Drinkers with Lifetime Abstainers as The Reference Group

Supplementary Figure 4. Funnel Plot for Ischaemic Heart Disease incidence Among Chronic Heavy Drinkers with Current Abstainers as The Reference Group

### **Supplementary Tables**

Supplementary Table 1. Characteristics of 34 Studies for Ischaemic Heart Disease in Heavy Drinkers, 1967-2012

## **Supplementary Methods**

### **Systematic Review Protocol**

**Title:** Systematic review and meta-analysis of heavy drinking and ischaemic heart disease

#### **Protocol Information**

##### **Dates**

All searches were conducted in week 4 of March 2014.

##### **Stage**

Review completed in April 2014.

Current stage: Meta-analysis completed.

##### **Collaborators**

None.

### **Review Methods**

#### **Review questions**

What is the relative risk for ischaemic heart disease among heavy drinkers?

#### **Context**

Specific risk of chronic heavy drinking for ischaemic heart disease (IHD) in comparison to lifetime abstainers has not been systematically examined before and it is currently unclear whether chronic heavy drinking has a protective, neutral, or detrimental association with IHD.

Population studies often miss many chronic heavy drinkers in order to maximize follow-up or because of other sampling issues [1]. Inadvertently, these samples mostly contain more favorable drinking behavior, such as low and regular alcohol consumption within a certain stratum of the socioeconomic continuum in high income countries. However, as is increasingly evident in middle income countries, this is not the drinking pattern observed globally [2]. Among participants missed in typical cohort studies is a subgroup of chronic heavy drinkers, namely people with alcohol use disorders (AUD), who drink on average considerably more than our threshold for heavy drinking [3 4].

#### **Condition or domain**

Ischaemic heart disease (morbidity or mortality).

#### **Primary outcomes**

Incidence of IHD events.

#### **Secondary outcomes**

Fatal and non-fatal IHD events.

#### **Intervention/exposure**

Chronic heavy drinking is the exposure of interest.

### **Comparators/controls**

Standardized mortality rates compared to the general population or measure of relative risk in comparison to abstainers (current or lifetime).

### **Types of studies to be included initially**

Observational studies (historical or prospective cohort and case-control studies).

### **Literature searches**

Using PRISMA and MOOSE guidelines [5 6], we conducted two systematic searches using electronic databases from their inception (clinical samples) or 1980 (population samples) to fourth week of March 2014 for original articles, excluding letters, editorials, conference abstracts, reviews, and comments for variations of search terms for the exposure (alcohol consumption), outcome (IHD), and study design. Additionally, we hand searched references of identified papers and relevant reviews and meta-analyses.

### **Participants/population**

Inclusion criteria: Adults ( $\geq 15$  years) from population samples or clinical samples (patients with AUD in treatment), IHD was analyzed as a separate outcome (ICD-9: 410-414, ICD-10: I20-25), a measure of risk and its corresponding measure of variability was reported (or sufficient data to calculate these), and English-, German-, or Spanish-language.

Exclusion criteria: Adolescents ( $< 15$  years), population samples from people with IHD-related conditions. We excluded self-reported IHD outcomes, as well as studies reporting estimates on cardiovascular outcomes combined rather than IHD separately and studies with precursors as outcome.

Further inclusion criteria for population studies:

Case-control or prospective or historical cohort study design, exposure measurement had to cover a reference period of more than 2 weeks for average alcohol consumption at baseline.

Further inclusion criteria for clinical studies:

Prospective or historical cohort study design, mortality risk for diagnosed participants currently in AUD treatment (in- or out-patient, this includes DSM-III and IV 'alcohol abuse and dependence' and International Classification of Diseases [ICD-9 and 10] 'harmful use' or 'non-dependent alcohol abuse' and 'alcohol dependence') compared with the general population.

### **Searches**

#### *Population samples*

Databases searched: MEDLINE, EMBASE, Web of Science (Science Citation Index Expanded, Social Sciences Citation Index, Arts & Humanities Citation Index), and ETOH (Alcohol and Alcohol Problems Science Database, National Institute on Alcohol Abuse and Alcoholism, January 1980–December 2003).

Search strategy in Medline (through OVID):

|    |                                                                                                                                                                                                                                                                                                |
|----|------------------------------------------------------------------------------------------------------------------------------------------------------------------------------------------------------------------------------------------------------------------------------------------------|
| 1  | human/                                                                                                                                                                                                                                                                                         |
| 2  | (comment or editorial or letter or meta-analysis or review).pt.                                                                                                                                                                                                                                |
| 3  | 1 not 2                                                                                                                                                                                                                                                                                        |
| 4  | (alcohol drinking or alcoholic beverages or heavy drinking occasion* or heavy episodic drinking or binge drinking or alcoholic intoxication or problem drinking or hangover* or irregular drinking or drinking pattern or inebriation).mp.                                                     |
| 5  | exp drinking behavior/ or exp alcohol drinking/ or exp binge drinking/                                                                                                                                                                                                                         |
| 6  | 4 or 5                                                                                                                                                                                                                                                                                         |
| 7  | (myocardial ischemia or myocardial infarction or myocardial infarct\$ or coronary disease or heart diseases or coronary artery disease or coronary heart disease or angina or cardiac death\$ or ischaemic heart disease or ischemic heart disease or cardiac event\$ or coronary event\$).mp. |
| 8  | exp myocardial ischemia/ or exp coronary artery disease/                                                                                                                                                                                                                                       |
| 9  | 7 or 8                                                                                                                                                                                                                                                                                         |
| 10 | exp Case-Control Studies/                                                                                                                                                                                                                                                                      |
| 11 | exp cohort studies/ or exp follow-up studies/ or exp longitudinal studies/ or exp prospective studies/ or exp retrospective studies/                                                                                                                                                           |
| 12 | exp risk/                                                                                                                                                                                                                                                                                      |
| 13 | 10 or 11 or 12                                                                                                                                                                                                                                                                                 |
| 14 | 3 and 6 and 9 and 13                                                                                                                                                                                                                                                                           |
| 15 | limit 14 to yr="1980 - 2014"                                                                                                                                                                                                                                                                   |

### *Clinical samples*

Databases searched: MEDLINE, EMBASE, Web of Science (Science Citation Index Expanded, Social Sciences Citation Index, Arts & Humanities Citation Index), and ETOH (Alcohol and Alcohol Problems Science Database, National Institute on Alcohol Abuse and Alcoholism, January 1980–December 2003).

Search strategy in Medline (through OVID):

|   |                                             |
|---|---------------------------------------------|
| 1 | (alcohol dependence or alcohol abuse).mp.   |
| 2 | exp Alcoholism/                             |
| 3 | exp Mortality, Premature/ or exp Mortality/ |
| 4 | cohort studies.mp. or exp Cohort Studies/   |
| 5 | 1 or 2                                      |
| 6 | 3 and 4 and 5                               |

### **URL to search strategy**

None.

### **Data extraction**

From all relevant articles we extracted authors' names, year of publication, country, calendar year(s) of baseline examination, follow-up period, setting, assessment of IHD and alcohol consumption or AUD diagnosis, mean and range of age at baseline, sex, number of observed IHD cases or deaths among participants by drinking group, number of total participants by drinking group, adjustment for potential confounders, and RR and its standard error. We used the most adjusted RR reported, and gave priority to estimates comparing heavy drinking to lifetime abstainers were abstracted by one reviewer. Full-text articles with uncertain eligibility were discussed by both authors until consensus was reached. To control for subjectivity, 10 papers were randomly selected and extracted by another author. No changes in abstraction were recorded. Primary

authors were not contacted by the authors in case there was not enough information presented in the article.

### **Risk of bias**

Most quality scores are tailored for meta-analyses of randomized trials of interventions [7-10] and many criteria do not apply to epidemiological studies like the ones examined here. Also, their use in meta-analyses remains controversial [10 11]. Thus, quality assessment was incorporated differently by including quality components such as study design and alcohol measurement into the inclusion and exclusion criteria (please see also Data abstraction and Supplementary Table 1 for details). Quality checklists therefore would not have been able to distinguish the quality of selected studies in our analysis.

### **Strategy for data synthesis**

Standardized mortality ratios (i.e. comparisons of mortality risks of patients in AUD treatment with the sex- and age-specific general population; see [12]), hazard ratios, odds ratios, and relative risks were treated as equivalent measures of risk. Analyses were stratified by sex where possible. If necessary, relative risks within studies were re-calculated based on the method described by Hamling et al. [13] and pooled across studies using inverse-variance weighted DerSimonian-Laird random-effect models to allow for between-study heterogeneity [14]. We quantified between-study heterogeneity using Cochran's Q [15] and the  $I^2$  statistic [16].  $I^2$  can be interpreted as the proportion of the total variation other than chance that is due to heterogeneity between studies. We tested for potential publication bias using Egger's test [17]. Sensitivity analyses for the influence of single studies on the pooled relative risks were conducted omitting one study at a time and re-estimating the pooled relative risk. No change in conclusions was observed. All meta-analytical procedures were conducted on the natural log scale in Stata statistical software, version 12.1 (Stata Corp, College Station, Texas), and  $p < 0.05$  (two-sided) was considered statistically significant.

### **Analysis of subgroups or subsets**

Subgroup analyses were completed for different classification of alcohol exposure (chronic heavy drinking based on average alcohol consumption and AUD patients in treatment), and for incidence, mortality, morbidity, and adjustment for confounders. Meta-regression was conducted to identify study characteristics (study design) that might influence the association between heavy drinking and IHD in all subgroups considered when more than 10 studies were available.

### **Type of review**

Prognostic.

### **Language**

English, Spanish, German.

### **Country**

Canada.

**Dissemination plans**

Publication in peer-review journal.

**Keywords**

Heavy drinking, alcohol use disorder, heart disease, incidence, mortality, systematic review, meta-analysis

**Details of any existing review of the same topic by the same authors**

None.

**Review status**

Completed, but not published.

**Supplementary Figure 1.** Search Results for Population Studies on Chronic Heavy Alcohol Consumption and Ischaemic Heart Disease Risk

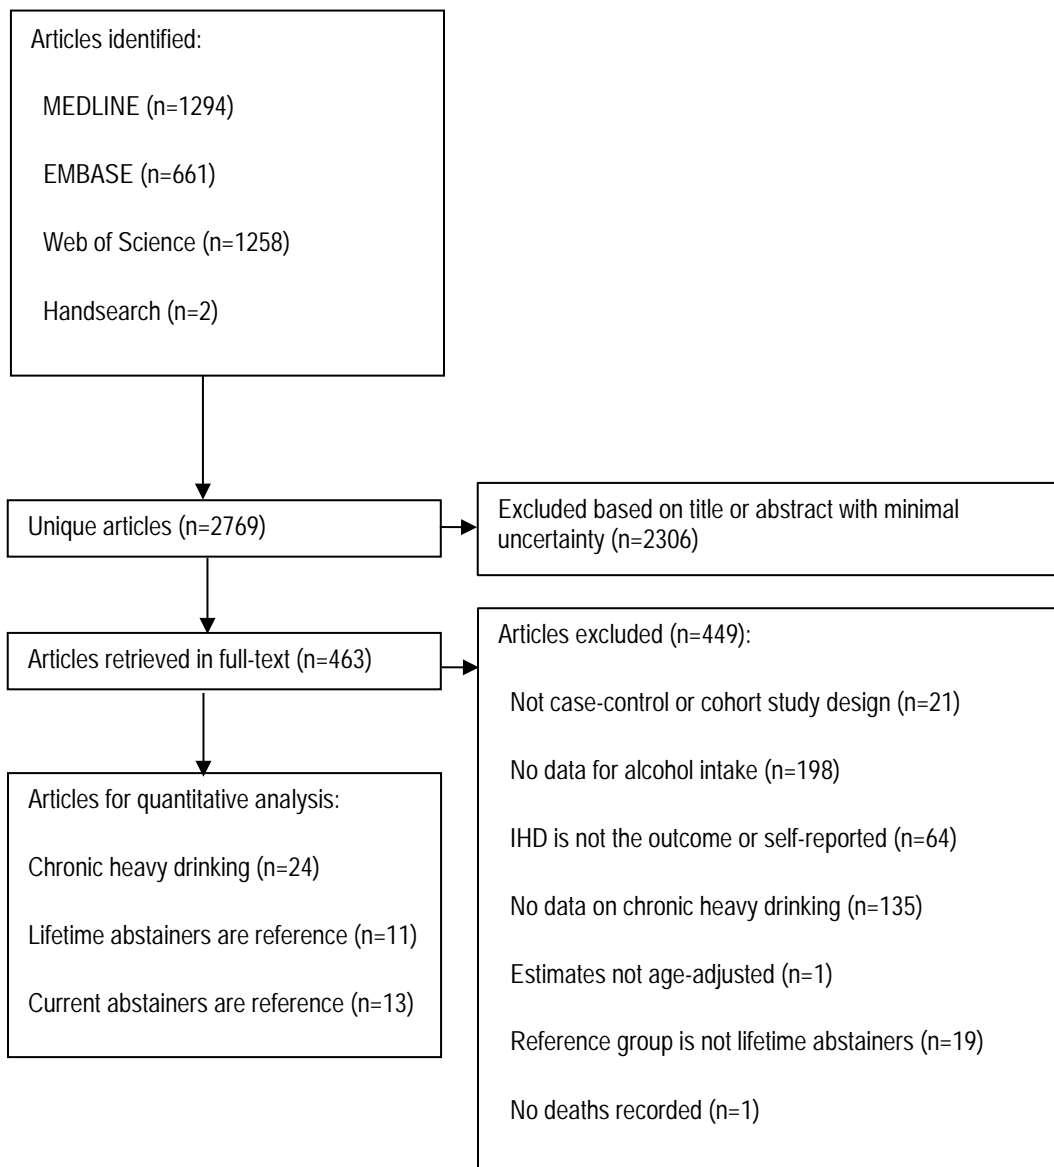

**Supplementary Figure 2.** Search Results for Patients with Alcohol Use Disorder (AUD, Clinical Samples) and Ischaemic Heart Diseases Mortality

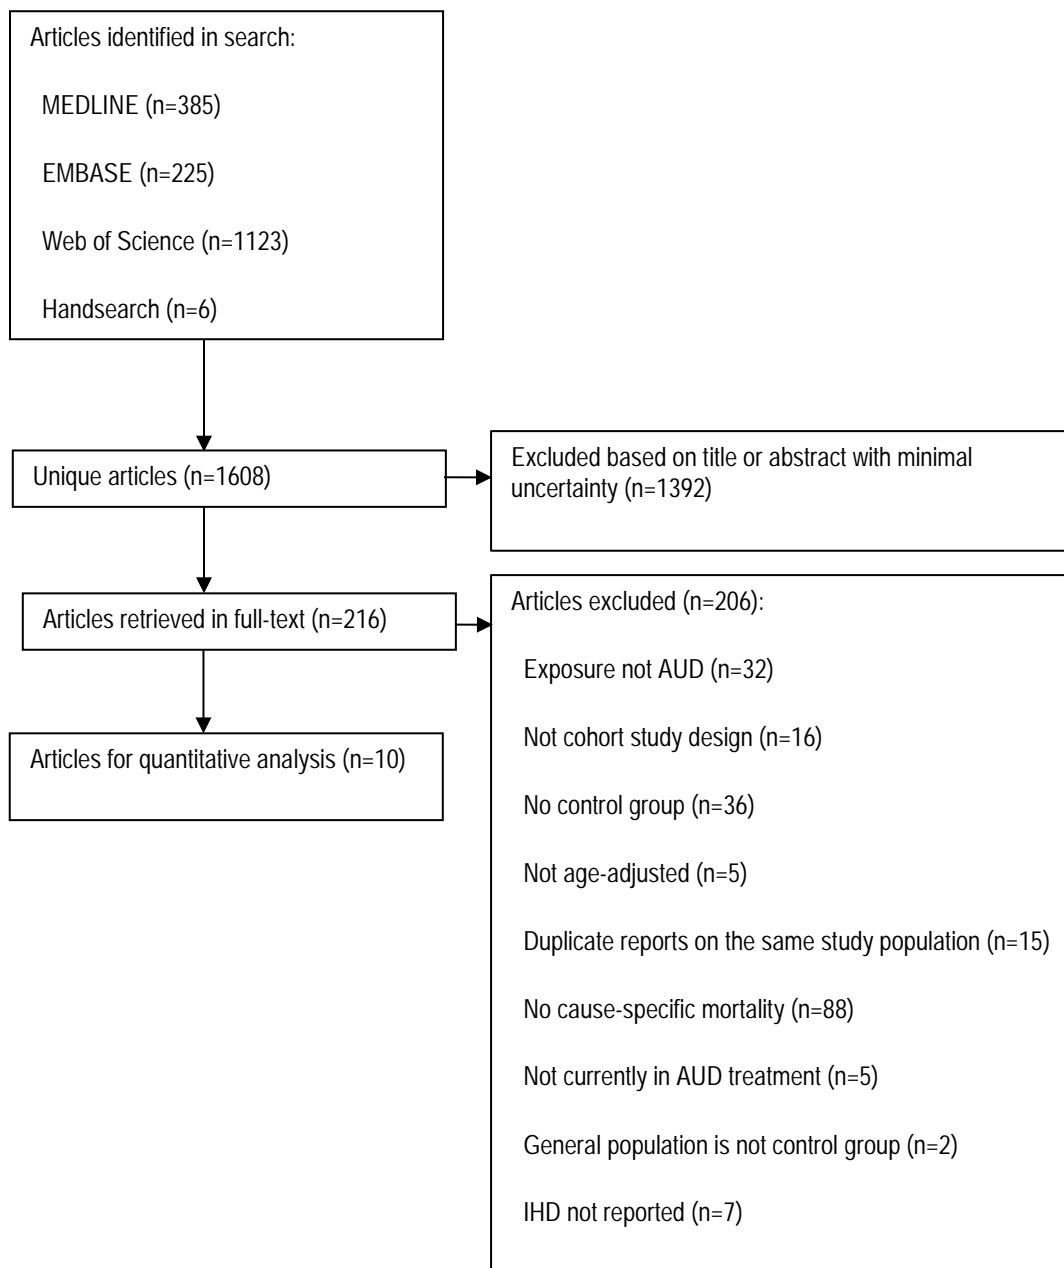

**Supplementary Figure 3.** Funnel Plot for Ischaemic Heart Disease Incidence among Chronic Heavy Drinkers with Lifetime Abstainers as the Reference Group

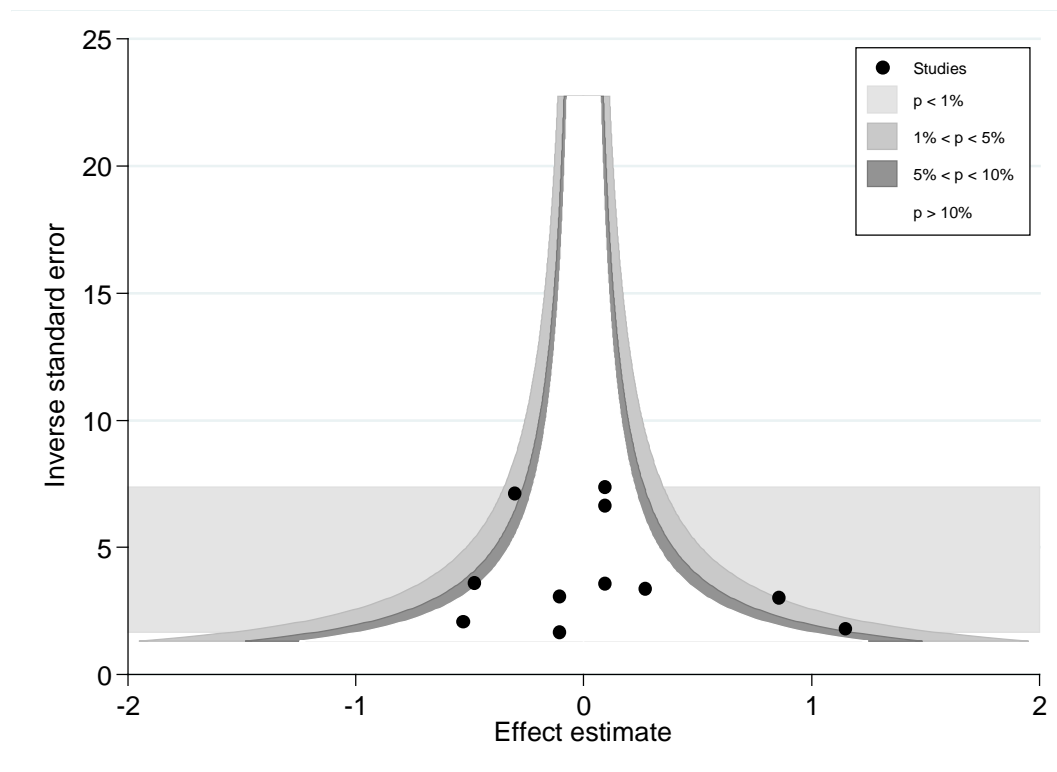

Effect size is  $\log(RR)$

Supplementary Figure 4. Funnel Plot for Ischaemic Heart Disease Incidence among Chronic Heavy Drinkers with Current Abstainers as the Reference Group

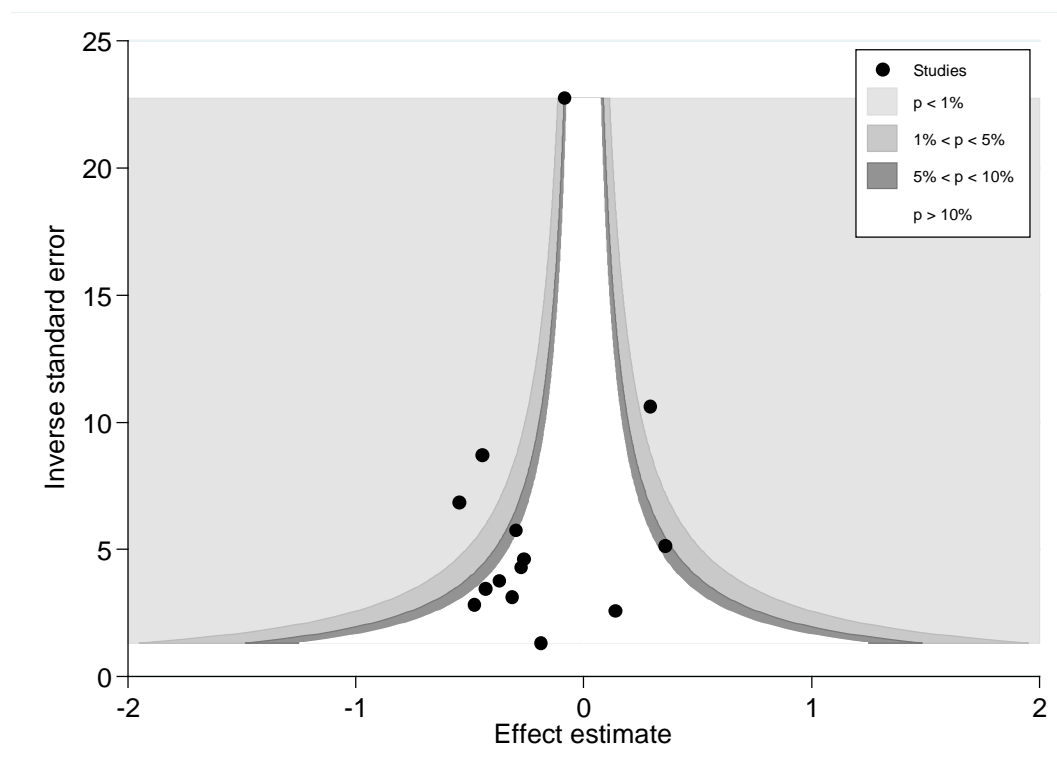

Effect size is  $\log(RR)$

**Supplementary Table 1.** Characteristics of 34 Studies for Ischaemic Heart Disease Risk in Chronic Heavy Drinkers, 1967-2012

| Source                                      | Sex, Age at baseline | Location, baseline period | Setting                                         | No. of heavy drinkers (IHD events/ total participants) | IHD assessment                                                                                                                           | Heavy drinking definition                                               | Reference category  | Adjustment                                                                                                                 |
|---------------------------------------------|----------------------|---------------------------|-------------------------------------------------|--------------------------------------------------------|------------------------------------------------------------------------------------------------------------------------------------------|-------------------------------------------------------------------------|---------------------|----------------------------------------------------------------------------------------------------------------------------|
| Population samples                          |                      |                           |                                                 |                                                        |                                                                                                                                          |                                                                         |                     |                                                                                                                            |
| Lifetime abstainers are the reference group |                      |                           |                                                 |                                                        |                                                                                                                                          |                                                                         |                     |                                                                                                                            |
| Dyer et al., 1981[18]                       | M, 40-55             | US, 1957-74               | Chicago Western Electric Company Study          | 12/78                                                  | Mortality, ischaemic heart disease (not defined)                                                                                         | ≥77 g/day average (based on total intake per month)                     | Lifetime abstainers | Age (participants free of definite ischaemic heart disease)                                                                |
| Kaufman et al., 1985[19]                    | M, 30-55             | US, 1980-83               | Hospital-based, North eastern US (78 hospitals) | 209/299                                                | Morbidity, first MI (WHO criteria)                                                                                                       | ≥67 g/day average (based on typical frequency and amount)               | Lifetime abstainers | Age ( no history of MI or angina pectoris among controls)                                                                  |
| Jackson et al., 1991[20]                    | M, 25-64             | New Zealand, 1986         | Auckland                                        | 33/68                                                  | Incidence (fatal and non-fatal events mortality and morbidity were reported separately), MONICA criteria                                 | >81 g/day (based on typical frequency and amount last 3 months)         | Lifetime abstainers | Age, smoking, hypertension, social class, exercise, recent (12 months) change in drinking                                  |
| Iso et al., 1995[21]                        | M, 40-69             | Japan, 1975-87            | Ikawa, Honjo and Kyowa                          | 4 <sup>a</sup> /439                                    | Incidence (fatal + non-fatal events), WHO criteria for ischaemic heart disease (definite or suspected MI, angina pectoris, sudden death) | ≥70 g/day average (based on usual weekly intake)                        | Lifetime abstainers | Age, hypertension, serum total cholesterol, smoking, diabetes (history of ischaemic heart disease or stroke were excluded) |
| McElduff & Dobson 1997[22]                  | M, 35-69             | Australia, 1983           | New South Wales (MONICA)                        | 89/103                                                 | Incidence (fatal + non-fatal events), definite MI, possible MI, or coronary                                                              | ≥90 g/day typical amount per drinking day on 5-6 days per week or daily | Lifetime abstainers | Age, smoking, BP, cholesterol, angina, stroke, MI, diabetes                                                                |

|                            |           |                          |                                                    |                       |                                                                                                                                                                                                                               |                                                                            |                     |                                                                                                                                           |
|----------------------------|-----------|--------------------------|----------------------------------------------------|-----------------------|-------------------------------------------------------------------------------------------------------------------------------------------------------------------------------------------------------------------------------|----------------------------------------------------------------------------|---------------------|-------------------------------------------------------------------------------------------------------------------------------------------|
| Rehm et al., 1997[23]      | M, 40-75  | US, 1971-87              | NHANES I                                           | 15/61                 | death<br>Incidence (fatal + non-fatal events), ICD-9: 410-414 based on death certificate or hospital discharge diagnosis                                                                                                      | ≥72 g/day (based on typical frequency and amount)                          | Lifetime abstainers | Age                                                                                                                                       |
| Kitamura et al., 1998[24]  | M, 40-59  | Japan, 1975-93           | Osaka                                              | 6/580                 | Incidence (fatal + non-fatal events) based on death certificates, absenteeism reports, insurance claims, and annual risk factor surveys; for all cases medical records were reviewed), ischaemic heart disease (WHO criteria) | ≥69 g/day (based on usual weekly intake)                                   | Lifetime abstainers | Age, serum total cholesterol, smoking, BMI, left ventricular hypertrophy, history of diabetes                                             |
| Klatsky et al., 2003[25]   | M, W, 18+ | US, 1978-98              | Kaiser Permanente, California                      | 88 <sup>a</sup> /2004 | Mortality, ICD-9: 410-414 from death certificates                                                                                                                                                                             | ≥6 drinks daily (FFQ)                                                      | Lifetime abstainers | Age, race, BMI, education, marital status, smoking, IHD symptoms at baseline                                                              |
| Romelsjö et al., 2003[26]  | M, 45-70  | Sweden, 1992-94          | Stockholm Heart Epidemiology Program (SHEEP)       | 81/153                | Incidence (fatal + non-fatal events), morbidity was reported separately, (all first MI, based on death certificate, autopsy findings, or medical records)                                                                     | ≥70 g/day average (based on frequency in previous year and typical amount) | Lifetime abstainers | Age, hospital, marital status, SES, smoking, physical activity, cardioatherosclerotic disease, job strain, social anchorage, life control |
| Inoue et al., 2012[27]     | M, 35-101 | Japan, 1988-2006         | Pooled analysis of 6 large cohort studies in Japan | 228/12 393            | Mortality based on death certificates, ICD-10: I20-25                                                                                                                                                                         | ≥69 g/day average (based on frequency and amount)                          | Lifetime abstainers | Age, area, smoking, BMI, hypertension, diabetes, leisure time physical activity                                                           |
| Bergmann et al., 2013 [28] | M, 25-70  | Europe (23 centres in 10 | EPIC                                               | 302/20 228            | Mortality (record linkage with death                                                                                                                                                                                          | >60 g/day (based on amount per week                                        | Lifetime abstainers | Stratified by age and centre; adjusted for BMI, height,                                                                                   |

|                                            |                    | countries),<br>1992-2000 |                                                                           |                      | and municipality<br>registries), ICD-10:<br>I20-25                                                                                                                                                                         | during the previous<br>12 months or in<br>lifetime)                |                      | waist circumference, intake<br>of fruits, vegetables, red<br>meat, and meat products,<br>dietary fibre, physical<br>activity, education, and<br>smoking |
|--------------------------------------------|--------------------|--------------------------|---------------------------------------------------------------------------|----------------------|----------------------------------------------------------------------------------------------------------------------------------------------------------------------------------------------------------------------------|--------------------------------------------------------------------|----------------------|---------------------------------------------------------------------------------------------------------------------------------------------------------|
| Current abstainers are the reference group |                    |                          |                                                                           |                      |                                                                                                                                                                                                                            |                                                                    |                      |                                                                                                                                                         |
| Friedman &<br>Kimball<br>1986[29]          | M, 30-<br>59       | US,<br>1948-72           | Framingham Heart<br>Study, Massachusetts                                  | 15/138               | Mortality, ischaemic<br>heart disease (not<br>defined)                                                                                                                                                                     | ≥67 g/day average<br>(based on total<br>intake per month)          | Current<br>abstainer | Age (all participants free of<br>ischaemic heart disease at<br>baseline)                                                                                |
| Shaper et al.,<br>1987[30]                 | M, 40-<br>59       | UK,<br>1978-85           | British Regional Heart<br>study                                           | 22/631               | Incidence (fatal +<br>non-fatal events),<br>ICD-9: 410-414,<br>based on death<br>certificates, non-<br>fatal MI: 2 of 3<br>criteria (severe<br>prolonged chest<br>pain, changes<br>detectable by ECG<br>or enzyme changes) | >70 g/day daily or<br>on most days                                 | Current<br>abstainer | Age, smoking years, social<br>class(participants free of<br>ischaemic heart disease at<br>baseline)                                                     |
| Boffetta et al.,<br>1990[31]               | M, 40-<br>59       | US,<br>1959-72           | CPS II                                                                    | 551/7698             | Mortality (based on<br>death certificates),<br>ICD-7: 420-422                                                                                                                                                              | ≥6 drinks/day (FFQ)                                                | Current<br>abstainer | Age, smoking                                                                                                                                            |
| Renaud et al.,<br>1998 [32]                | M, 40-<br>60       | France,<br>1978-1993     | Health examination at<br>the Centre de<br>Medicine Preventive<br>de Nancy | 86/9385              | Mortality (based on<br>death information<br>from physicians)<br>ICD-9: 410-414                                                                                                                                             | ≥77 g/day (based<br>on daily<br>consumption)                       | Current<br>abstainer | Age, education, smoking,<br>serum total cholesterol,<br>systolic blood pressure, BMI                                                                    |
| Maskarinec et<br>al., 1998[33]             | M, W,<br>30+       | US,<br>1975-94           | Multiethnic cohort<br>study, Hawaii                                       | 12/308               | Mortality (based on<br>mortality files), ICD-<br>9: 410-414                                                                                                                                                                | ≥43 drinks per week<br>(based on usual<br>amount and<br>frequency) | Current<br>abstainer | Age, ethnicity, smoking, BMI,<br>education,                                                                                                             |
| Gun et al.,<br>2006[34]                    | M, not<br>reported | Australia,<br>1980-2001  | Health Watch<br>(Petroleum-industry<br>workers)                           | 30/1226 <sup>a</sup> | Mortality (based on<br>death register),<br>ischaemic heart<br>disease (death<br>records provided by                                                                                                                        | ≥7 drinks per day<br>(based on typical<br>frequency and<br>amount) | Current<br>abstainer | Age, calendar year, smoking                                                                                                                             |

|                                               |          |                             |                                                                    |         |                                                                                                                                                                                 |                                                                  |                   |                                                                                                                                |
|-----------------------------------------------|----------|-----------------------------|--------------------------------------------------------------------|---------|---------------------------------------------------------------------------------------------------------------------------------------------------------------------------------|------------------------------------------------------------------|-------------------|--------------------------------------------------------------------------------------------------------------------------------|
| Bazzano et al., 2009[35]                      | M, 40+   | China, 1991-2000            | China National Hypertension Survey Epidemiology Follow-up Study    | 52/6389 | NDI)<br>Incidence (fatal + non-fatal events), mortality reported separately, (determined by endpoint committee based on medical records, death certificates)                    | ≥63 g/day (based on number of drinks per month)                  | Current abstainer | Age, BMI, BP, physical activity, smoking, diabetes, education, urban vs rural, living in North China (history of IHD excluded) |
| Sull et al., 2009[36]                         | M, 55+   | South Korea, 1985-2005      | Kangwha Cohort Study                                               | 2/182   | Mortality (based on death certificate), ICD-10: I20-I25                                                                                                                         | ≥72 g/day daily (based on frequency per year and typical amount) | Current abstainer | Age, history of chronic disease, smoking, BMI, BP, education                                                                   |
| Oliveira et al., 2009[37]                     | M, 18+   | Portugal, 1999-2003         | Cardiology Department of 4 hospitals, Porto                        | 186/284 | Morbidity, first AMI patients who survived four days after diagnosis                                                                                                            | ≥60 g/day (FFQ)                                                  | Current abstainer | Age, education, family history of MI, waist-to-hip ratio, smoking, total energy intake, leisure time physical activity         |
| Ruidavets et al., 2010 (Northern Ireland)[38] | M, 50-59 | Northern Ireland, 1991-2004 | Prospective Epidemiological Study of Myocardial Infarction (PRIME) | 9/240   | Incidence (fatal + non-fatal events), defined as coronary death and non-fatal MI (established by medical committee based on detailed clinical information from hospital or GPs) | ≥75 g/day average (based on usual weekly total intake)           | Current abstainer | Restricted age range, previous IHD (medically diagnosed or Rose questionnaire) excluded                                        |
| Ruidavets et al., 2010 (France)[38]           | M, 50-59 | France, 1991-2004           | Prospective Epidemiological Study of Myocardial Infarction (PRIME) | 33/1134 | Incidence (fatal + non-fatal events), defined as coronary death and non-fatal MI (established by medical committee based on detailed clinical information from hospital or GPs) | ≥75 g/day average (based on usual weekly total intake)           | Current abstainer | Restricted age range, previous IHD (medically diagnosed or Rose questionnaire) excluded                                        |

|                             |             |                                     |                                     |                     |                                                                                                                                              |                                            |                   |                                                                                                                                                                                                                              |
|-----------------------------|-------------|-------------------------------------|-------------------------------------|---------------------|----------------------------------------------------------------------------------------------------------------------------------------------|--------------------------------------------|-------------------|------------------------------------------------------------------------------------------------------------------------------------------------------------------------------------------------------------------------------|
| Hvidtfeldt et al., 2010[39] | M, W, 30-80 | North America and Europe, 1974-1996 | Pooled analysis of 8 cohort studies | 105/2972            | Incidence (fatal + non-fatal events), ischaemic heart disease (standard criteria met in all individual studies)                              | ≥60 g/day (FFQ)                            | Current abstainer | Age, year of baseline, smoking, BMI, education, physical activity, energy intake, polysaturated fat, monosaturated fat, saturated fat, fiber, cholesterol intake, study origin (participants free of CVD, diabetes, cancers) |
| Yang et al., 2012[40]       | M, 40-79    | China, 1990-2005                    | Nationwide cohort study             | 123/20 586          | Mortality (based on death certificate), ICD-9: 410-414                                                                                       | ≥60 g/day (based on typical weekly intake) | Current abstainer | Age, geographical area (participants with prior diseases at baseline were excluded)                                                                                                                                          |
| Romelsjö et al., 2012[41]   | M, 18-20    | Sweden, 1969-2004                   | Swedish conscripts                  | 12/600 <sup>a</sup> | Incidence (fatal + non-fatal events) mortality (based on National Death Register and National Swedish inpatient register), , ICD-9: 410 (MI) | >60 g/day (based on frequency and amount)  | Current abstainer | Smoking, father (blue collar worker), divorced parents, runaway from home, truancy, low emotional control, low social maturity, IQ, health status, BMI                                                                       |

#### AUD treatment patients (clinical samples)

|                             |           |                   |                                                      |          |                                                                                                                                                              |                                                                                                |                            |                           |
|-----------------------------|-----------|-------------------|------------------------------------------------------|----------|--------------------------------------------------------------------------------------------------------------------------------------------------------------|------------------------------------------------------------------------------------------------|----------------------------|---------------------------|
| Sundby 1967 [42]            | M, 15+    | Norway, 1925-62   | Ullevål Hospital, Psychiatric Department, Oslo       | 97/1716  | National Central Bureau of Statistics comparison to Oslo mortality statistics, ICD-7: ischaemic heart disease                                                | Diagnosis of alcoholism                                                                        | General population         | Age- and sex-standardized |
| Schmidt & de Lint 1972 [43] | W, M, 15+ | Canada, 1951-1964 | Clinic of the Addiction Research Foundation, Toronto | 258/6478 | Death records in Ontario, other provinces, and some foreign countries, ICD-7: 420 ischaemic heart disease (253 cases), 422 myocardial degeneration (5 cases) | All patients with physical examination at entry for alcoholism treatment at specialized clinic | Ontario general population | Age- and sex-standardized |

|                             |             |                    |                                                                                  |          |                                                                                     |                                                                                                         |                    |                                                          |
|-----------------------------|-------------|--------------------|----------------------------------------------------------------------------------|----------|-------------------------------------------------------------------------------------|---------------------------------------------------------------------------------------------------------|--------------------|----------------------------------------------------------|
| Adelstein & White 1976 [44] | W, M, 15+   | UK, 1953, 1974     | 4 London Mental Hospitals, Mental Health Enquiry                                 | 137/2070 | ICD-8: 410-414                                                                      | Inpatient treatment for alcoholism                                                                      | General population | Age- and sex-standardization                             |
| Thorarinsson 1979 [45]      | M, 15+      | Iceland, 1951-1974 | National Psychiatric Register                                                    | 125/2863 | Death certificate, underlying cause, ICD-7: 420                                     | First admission to in- or out-patient institution                                                       | General population | Age-standardized                                         |
| Polich et al., 1981 [46]    | M, 18+      | US, 1973-77        | 8 of 44 NIAAA Alcoholism Treatment Centers                                       | 24/755   | Underlying cause, ICDA-8: 410-414                                                   | Admission to specialized program for alcoholism                                                         | General population | Age-, sex-, and race-standardized                        |
| Lindberg & Agren 1988 [47]  | W, M, 15+   | Sweden, 1969-1983  | Magnus Huss Clinic, Karolinska Hospital                                          | 126/4543 | National Central Bureau of Statistics, underlying cause, ICD-8: 410-414             | First admission for alcoholism to specialized clinic                                                    | General population | Age- and sex-standardized                                |
| Denison et al., 1997 [48]   | M, 20+      | Sweden, 1986-1991  | University Psychiatric Clinic, Lillhagen Hospital, Goeteborg                     | 25/1049  | Death certificate, underlying cause, ICD-9: 410-414                                 | Inpatients for detoxification, DSM-III-R criteria for alcohol dependence                                | General population | Age, calendar year, and length of follow-up              |
| Noda et al., 2001 [49]      | M, 21-77    | Japan, 1972-92     | All in or out-patient treatment facilities, Takatsuki City                       | 4/306    | Death certificate, underlying cause, ICD-9: 410-414                                 | Diagnosis of alcohol dependence/psychosis                                                               | General population | Age- and time period standardization                     |
| Haver et al., 2009 [50]     | W, 18+      | Sweden, 1981-2007  | Early Treatment for Women with Alcohol Addiction (EWA) Unit, Karolinska Hospital | 10/420   | Swedish Causes of Death Register, ICD-8, ICD-9, and ICD-10: ischaemic heart disease | First admission for alcohol treatment (second sample 96% met DSM-III-R criteria for alcohol dependence) | General population | Matched on year of birth, marital status, SES, education |
| Saieva et al., 2012 [51]    | W, M, 16-94 | Italy, 1985-2006   | Alcohol Centre treatment                                                         | 30/2272  | Regional Mortality Register, ICD-9: 410-414                                         | Physician diagnosis alcohol dependence (ICD-9)                                                          | General population | Age- and sex-standardized                                |

Abbreviations: AMI, acute myocardial infarction; AUD, Alcohol use disorder; BMI, body mass index; BP, blood pressure; CVD, cardiovascular disease; DSM, Diagnostic and Statistical Manual of Mental Disorders; ICD, International Classification of Diseases; EPIC, European Prospective Investigation into Cancer and Nutrition; FFQ, food frequency questionnaire; ICDA, International Classification of Diseases, Adapted for Use in the United States ; IHD, ischaemic heart disease; M, men only; MI, myocardial infarction; MONICA, Monitoring Trends and Determinants in Cardiovascular Disease; NHANES, National Health and Nutrition Examination Survey; PRIME, Prospective Epidemiological Study of Myocardial Infarction; SES, socio-economic status; SHEEP, Stockholm Heart Epidemiology Program; W, women only; WHO, World Health organization. ICD codes were included were reported.

<sup>a</sup> Estimated.

## Reference List

1. Rothman KJ, Greenland S, Lash TL. *Modern Epidemiology, 3rd ed.* Philadelphia, PA: Lippincott Williams & Wilkins, 2008.
2. World Health Organization. *Global status report on alcohol and health.* Geneva, Switzerland: World Health Organization, 2011.
3. Rehm J, Anderson P, Gual A, Kraus L, Marmet S, Room R, et al. The tangible common denominator of substance use disorders: a reply to commentaries to Rehm et al.(2013). *Alcohol Alcohol* 2014;49:118-22
4. Rivas I, Sanvisens A, Bolao F, Fuster D, Tor J, Pujol R, et al. Impact of medical comorbidity and risk of death in 680 patients with alcohol use disorders. *Alcohol Clin Exp Res* 2012;37:E221-E27
5. Moher D, Liberati A, Tetzlaff J, Altman DG, The Prisma Group. Preferred reporting items for systematic reviews and meta-analyses: The PRISMA Statement. *PLoS Med* 2009;6:e1000097
6. Stroup DF, Berlin JA, Morton SC, Olkin I, Williamson GD, Rennie D. Meta-analysis of observational studies in epidemiology: a proposal for reporting. *JAMA* 2000;283:2008-12
7. Moher D, Pham B, Jones A, Cook DJ, Jadad AR, Moher M, et al. Does quality of reports of randomised trials affect estimates of intervention efficacy reported in meta-analyses? *Lancet* 1998;352:609-13
8. Chalmers TC, Smith HJ, Blackburn B, Silverman B, Schroeder B, Reitman D, et al. A method for assessing the quality of a randomized control trial. *Control Clin Trials* 1981;2:31-49
9. Detsky AS, Naylor CD, O'Rourke K, McGreer AJ, L'Abbé KA. Incorporating variations in the quality of individual randomized trials into meta-analysis. *J Clin Epidemiol* 1992;45:255-65
10. Greenland S, O'Rourke K. On the bias produced by quality scores in meta-analysis, and a hierarchical view of proposed solutions. *Biostatistics* 2001;2:463-71
11. Herbison P, Hay-Smith J, Gillespie WJ. Adjustment of meta-analyses on the basis of quality scores should be abandoned. *J Clin Epidemiol* 2006;59:1249-56
12. Rothman K, Greenland S. *Modern epidemiology.* Philadelphia, PA: Lippincott-Raven Publishers, 1998.
13. Hamling J, Lee P, Weitkunat R, Ambühl M. Facilitating meta-analyses by deriving relative effect and precision estimates for alternative comparisons from a set of estimates presented by exposure level or disease category. *Stat Med* 2008;27:954-70
14. DerSimonian R, Laird N. Meta-analysis in clinical trials. *Control Clin Trials* 1986;7:177-88
15. Cochran WG. The combination of estimates from different experiments. *Biometrics* 1954;10:101-29
16. Higgins JP, Thompson SG. Quantifying heterogeneity in a meta-analysis. *Stat Med* 2002;21:1539-58
17. Egger M, Smith GD, Schneider M, Minder C. Bias in meta-analysis detected by a simple, graphical test. *BMJ* 1997;315:629-34
18. Dyer AR, Stamler J, Paul O, Berkson DM, Shekelle RB, Lepper MH, et al. Alcohol, cardiovascular risk factors and mortality: the Chicago experience. *Circulation* 1981;64:III 20-27
19. Kaufman DW, Rosenberg L, Helmrich SP, Shapiro S. Alcoholic beverages and myocardial infarction in young men. *Am J Epidemiol* 1985;121:548-54
20. Jackson R, Scragg R, Beaglehole R. Alcohol consumption and risk of coronary heart disease. *BMJ* 1991;303:211-16
21. Iso H, Kitamura A, Shimamoto T, Sankai T, Naito Y, Sato S, et al. Alcohol intake and the risk of cardiovascular disease in middle-aged Japanese men. *Stroke* 1995;26:767-73
22. McElduff P, Dobson AJ. How much alcohol and how often? Population based case-control study of alcohol consumption and risk of a major coronary event. *BMJ* 1997;314:1159-64
23. Rehm J, Bondy S, Sempos CT, Vuong CV. Alcohol consumption and coronary heart disease morbidity and mortality. *Am J Epidemiol* 1997;146:495-501

24. Kitamura A, Iso H, Sankai T, Naito Y, Sato S, Kiyama M, et al. Alcohol intake and premature coronary heart disease in urban Japanese men. *Am J Epidemiol* 1998;147:59-65
25. Klatsky AL, Friedman GD, Armstrong MA, Kipp H. Wine, liquor, beer, and mortality. *Am J Epidemiol* 2003;158:585-95
26. Romelsjö A, Branting M, Hallqvist J, Alfredsson L, Hammar N, Leifman A, et al. Abstention, alcohol use and risk of myocardial infarction in men and women taking account of social support and working conditions: the SHEEP case-control study. *Addiction* 2003;98:1453-62
27. Inoue M, Nagata C, Tsuji I, Sugawara Y, Wakai K, Tamakoshi A, et al. Impact of alcohol intake on total mortality and mortality from major causes in Japan: a pooled analysis of six large-scale cohort studies. *J Epidemiol Community Health* 2012;66:448-56
28. Bergmann MM, Rehm J, Klipstein-Grobusch K, Boeing H, Schutze M, Drogan D, et al. The association of pattern of lifetime alcohol use and cause of death in the European Prospective Investigation into Cancer and Nutrition (EPIC) study *Int J Epidemiol* 2013;42:1772-90
29. Friedman LA, Kimball AW. Coronary heart disease mortality and alcohol consumption in Framingham. *Am J Epidemiol* 1986;124:481-89
30. Shaper AG, Phillips AN, Pocock SJ, Walker M. Alcohol and Ischemic heart disease in middle-aged British men. *BMJ* 1987;294:733-37
31. Boffetta P, Garfinkel L. Alcohol drinking and mortality among men enrolled in an American Cancer Society prospective study. *Epidemiology* 1990;1:342-48
32. Renaud SC, Gueguen R, Schenker J, d'Houtaud A. Alcohol and mortality in middle-aged men from Eastern France. *Epidemiology* 1998;9:184-88
33. Maskarinec G, Meng L, Kolonel L. Alcohol intake, body weight, and mortality in a multiethnic prospective cohort. *Epidemiology* 1998;9:654-61
34. Gun RT, Pratt N, Ryan P, Gordon I, Roder D. Tobacco and alcohol-related mortality in men: estimates from the Australian cohort of petroleum industry workers. *Aust N Z J Public Health*. 2006;30:318-24
35. Bazzano LA, Gu DF, Reynolds K, Chen J, Wu XQ, Chen CS, et al. Alcohol consumption and risk of coronary heart disease among Chinese men. *Int J Cardiol*. 2009;135:78-85
36. Sull JW, Yi SW, Nam CM, Ohrr H. Binge drinking and mortality from all causes and cerebrovascular diseases in Korean men and women: a Kangwha cohort study. *Stroke* 2009;40:2953-58
37. Oliveira A, Barros H, Azevedo A, Bastos J, Lopes C. Impact of risk factors for non-fatal acute myocardial infarction. *Eur J Epidemiol* 2009;24:425-32
38. Ruidavets JB, Ducimetière P, Vans A, Montaye M, Haas B, Bingham A, et al. Patterns of alcohol consumption and ischaemic heart disease in culturally divergent countries: the Prospective Epidemiological Study of Myocardial Infarction (PRIME). *BMJ* 2010;341:c6077
39. Hvidtfeldt UA, Tostrup JS, Jakobsen MU, Heitmann BL, Grønbaek M, O'Reilly E, et al. Alcohol intake and risk of coronary heart disease in younger, middle-aged, and older adults. *Circulation* 2010;121:1589-97
40. Yang L, Zhou M, Sherliker P, Cai Y, Peto R, Wang L, et al. Alcohol drinking and overall and cause-specific mortality in China: nationally representative prospective study of 220,000 men with 15 years of follow-up. *Int J Epidemiol* 2012;41:1101-13
41. Romelsjö A, Allebeck P, Andréasson S, Leifman A. Alcohol, mortality and cardiovascular events in a 35 year follow-up of a nationwide representative cohort of 50,000 Swedish conscripts up to age 55. *Alcohol Alcohol* 2012;47:322-27
42. Sundby P. Alcoholism and mortality. Oslo, 1967.
43. Schmidt W, de Lint J. Causes of death of alcoholics. *Q J Stud Alcohol* 1972;33:171-85
44. Adelstein A, White G. Alcoholism and mortality. *Popul Trends* 1976;6:7-13
45. Thorarinsson AA. Mortality among men alcoholics in Iceland, 1951-74. *J Stud Alcohol* 1979;40:704-18

46. Polich JM, Armor DJ, Braiker HB. *The Course of Alcoholism: Four Years After Treatment*. New York: John Wiley & Sons, 1981.
47. Lindberg S, Agren G. Mortality among male and female hospitalized alcoholics in Stockholm 1962-1983. *Br J Addict* 1988;83:1193-200
48. Denison H, Berkowicz A, Oden A, Wendestam C. The significance of coronary death for the excess mortality in alcohol-dependent men. *Alcohol Alcohol* 1997;32:517-26
49. Noda T, Imamichi H, Tanaka H. Cause-specific mortality risk among male alcoholics residing in the Osaka metropolitan area. *Psychiatry Clin Neurosci* 2001;55:465-72
50. Haver B, Gjestad R, Lindberg S. Mortality risk up to 25 years after initiation of treatment among 420 Swedish women with alcohol addiction. *Addiction* 2009;104:413-19
51. Saieva C, Bardazzi G, Masala G, Quartini A, Ceroti M, Iozzi A, et al. General and cancer mortality in a large cohort of Italian alcoholics. *Alcohol Clin Exp Res* 2012;36:342-50
